# Supplementary material for: Synthesis and performance of hollow LiNi0.5Mn1.5O4 with different particle sizes for lithium-ion batteries
Source: Royal Society of Chemistry journal article supplement (doi:10.1039/c5ra17933e), 2015-01-01
Supplement: c5ra17933e1.pdf [file c5ra17933e1.pdf]

## Supporting Information

### Synthesis and performance of hollow $\text{LiNi}_{0.5}\text{Mn}_{1.5}\text{O}_4$ with different particle sizes for lithium-ion batteries

Yuan Xue,<sup>a</sup> Zhen-Bo Wang,<sup>a,\*</sup> Li-Li Zheng<sup>a,b</sup>, Fu-Da Yu<sup>a,b</sup>, Bao-Sheng Liu<sup>a</sup>, Yin Zhang,<sup>a</sup> Yu-Xiang Zhou<sup>b</sup>

<sup>a</sup> School of Chemical Engineering and Technology, Harbin Institute of Technology, No. 92 West-Da Zhi Street, Harbin, 150001 China

<sup>b</sup> School of Science, Harbin Institute of Technology, No.92 West-Da Zhi Street, Harbin, 150001 China

\* Corresponding author. Tel.: +86-451-86417853; Fax: +86-451-86418616.

Email: [wangzhh@hit.edu.cn](mailto:wangzhh@hit.edu.cn) (Z.B. Wang)

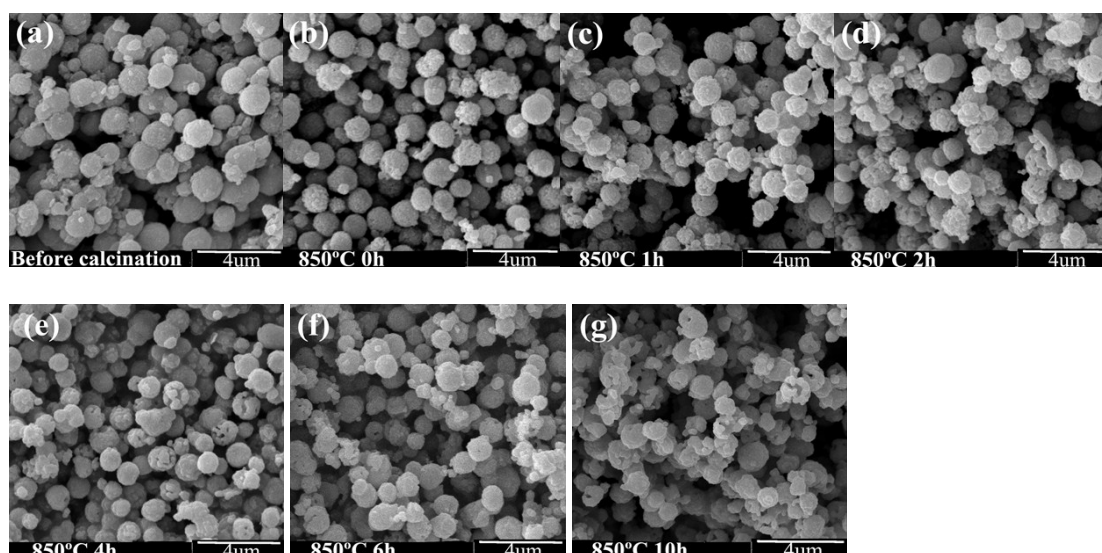

**Figure S1.** SEM micrographs of mixture of  $\text{MnCO}_3\text{-4}$  before calcined (a), when temperatures reach 850 °C (b) and after calcined at 850 °C for 1, 2, 4, 6, 10 hours (c~g).

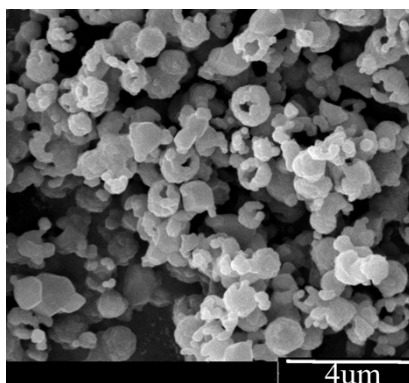

**Figure S2.** SEM micrographs of product obtained by LiOH and MnCO<sub>3</sub>-4 without Ni(NO<sub>3</sub>)<sub>2</sub>.

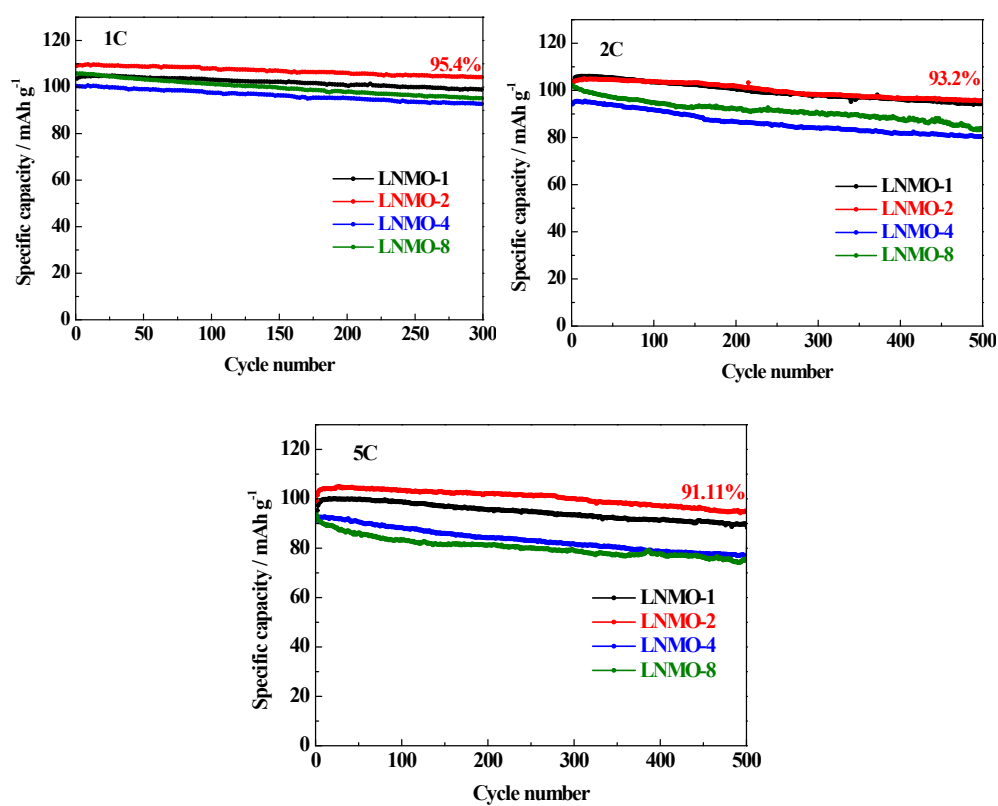

**Figure S3.** Cycling performance of four LiNi<sub>0.5</sub>Mn<sub>1.5</sub>O<sub>4</sub> samples at rates of 1 C, 2 C and 5 C.
